# Supplementary material for: A 1.8‐kb insertion in the 3′‐UTR of RXFP2 is associated with polledness in sheep
Source: PubMed Central journal article supplement — Anim Genet. 2015 Jun 23;46(4):457–61. doi: 10.1111/age.12309 (PMC4744954; doi:10.1111/age.12309), 2015-06-23
Supplement: AGE-46-457-s001.pdf [file AGE-46-457-s001.pdf]

**Table S1: Primers used for detection of the sheep polled mutation.**

| <b>Product</b> | <b>Chr</b> | <b>Position<br/>(OAR v3.1)</b> | <b>Forward primer (fwd)</b> | <b>Reverse primer (rev)</b> | <b>Product<br/>size (bp)</b> |
|----------------|------------|--------------------------------|-----------------------------|-----------------------------|------------------------------|
| 1              | 10         | 29,454,625 -<br>29,455,605     | TAGGCACATGGGGAAGTGA         | GGCAAGTTCTGCCTTCACA         | 980                          |
| 2              | 10         | 29,455,117 -<br>29,456,104     | GCCCTATCAGTGGTCTTTGC        | TAACGGTGGTTTTACGACA         | 988                          |
| 3              | 10         | 29,455,677 -<br>29,456,673     | TGCCCAATTTTCCTCTGTG         | CGGGGTTGTAGCCAATTTT         | 997                          |
| 4              | 10         | 29,456,564 -<br>29,457,644     | TGTTGGCGTTAACAAAATGG        | AGACCGTTTTTCCACCACTG        | 1081                         |
| 5              | 10         | 29,457,543 -<br>29,457,975     | CTGGCAAGGTCACCAAGTCT        | CTGATGGGCAGTGGATCTCT        | 433*                         |
| 6              | 10         | 29,457,917 -<br>29,458,615     | GGTGGGCATCCACTGGTA          | GGCAAAGATTTTCCATAAGGTG      | 699**                        |

\* PCR product includes a gap of unknown size; \*\* PCR product includes exon 18 of *RXFP2*
