# Supplementary material for: A 1.8‐kb insertion in the 3′‐UTR of RXFP2 is associated with polledness in sheep
Source: PubMed Central journal article supplement — Anim Genet. 2015 Jun 23;46(4):457–61. doi: 10.1111/age.12309 (PMC4744954; doi:10.1111/age.12309), 2015-06-23
Supplement: AGE-46-457-s002.pdf [file AGE-46-457-s002.pdf]

## Figure S1: Sequences of horned and polled sheep

Sequences shown in black font correspond to **OAR 10: 29456001-29457918** (sheep genome assembly version 3.1). The precise location (breakpoint) of the insertion is indicated with a blue vertical bar and submitted to **dbVar** (<http://www.ncbi.nlm.nih.gov/dbvar>) under accession **nsv1079043**. The segments which are identical in the horned and polled sheep are shown in black. The sequence of the 1.8 kb insertion in the polled sheep is shown in blue; the annotated *EEF1A1-like* gene is shown underlined. At the position of the red star an additional segment of 83 bp is present in the reference sequence and which is annotated as intron of the *EEF1A1-like* gene. This 83 bp DNA segment was shown to be absent in the sequenced polled sheep.

### Horned sheep:

**GCCACGCTAGAATTAGATGTCATGAGTGT**TTTTTATTTAATGACAGTG | **CAACTCAATTTAAG**  
**AGCAGACTGTGCAGGGCCAAGGGG**

### Polled sheep:

**GCCACGCTAGAATTAGATGTCATGAGTGT**TTTTTATTTAATGACAGTG | **CAGCTTTTTCGCAA**  
**CGGGTTTTGCCGCCAGGACACAGGTGTCGTGAAAACCACCGTTAAACCTAAGCCAAAATGGGA**  
**AAGGAGAAGACCCACATCAACATCGTTGTCATTGGGCACGTAGATTCAGGGAAGTCTACCAC**  
**GACTGGCCATCTGATCTACAAATGTGGCGGGATCGACAAGAGAACAATTGAAAAGTTTCGAGA**  
**AGGAGGCAGCCGAGATGGGAAAGGGCTCCTTCAAATATGCCTGGGTCTTGGACAAACTGAAA**  
**GCTGAACGTGAGCGTGGTATTACCATTGATATCTCCCTGTGGAAGTTTGAGACCAGCAAGTA**  
**CTATGTTACCATCATTGATGCCCCAGGACACAGAGACTTCATCAAAAACATGATTACAGGCA**  
**CATCCCAGGCTGACTGTGCTGTCCTGATTGTTGCTGCTGGTGTGGTGAATTTGAAGCCGGT**  
**ATCTCCAAGAACGGGCAGACCCGTGAGCATGCCCTTCTGGCTTACACCCTGGGTGTGAAACA**  
**ACTAATTGTTGGCGTTAAACAAAATGGATTCTACTGAGCCACCCTATAGCCAGAAGAGATACG**  
**AGGAAATTGTTAAGGAAGTCAGCACCTACATTAAGAAAATTGGCTACAACCCCGACACAGTA**  
**GCATTTGTGCCAATTTCTGGCTGGAATGGTGACAACATGCTGGAGCCAAGTGCTAATATGCC**  
**ATGGTTCAAGGGATGGAAAGTCACCCGTAAGGACGGCAATGCCAGTGGAAACCACCCTGCTTG**  
**AAGCTCTGGATTGCATCCTGCCACCAACTCGCCAACTGACAAAACCCTTGCCTTTCCTCTC**  
**CAGGATGTCTATAAAATTGGTGGTATTGGTACTGTACCTGTGGGTCTGTGGAGACTGGTGT**  
**TCTCAAACCTGGCATGGTGGTCACCTTTGCTCCAGTCAATGTAACAACCTGAGGTGAAGTCTG**  
**TAGAAATGCACCATGAAGCACTGAGTGAAGCCCTTCTGGGGACAATGTGGGCTTCAATGTC**  
**AAGAACGTGTCTGTCAAAGATGTCCGTCTGGCAATGTGGCTGGTGACAGCAAAAATGATCC**  
**ACCCATGGAAGCTGCTGGCTTACAGCTCAG\***GTGATTATTTTGAACCATCCAGGCCAAATC  
**AGTGCTGGATATGCACCTGTGCTGGATTGTACACAGCTCACATTGCTTGAAGTTTGCTGA**  
**GCTGAAGGAGAAGATTGATCGTCTGTTCTGGGAAAAGCTGGAAGATGGCCCTAAATTTCTTGA**  
**AATCTGGTGACGCTGCCATCGTTGATATGGTTCTGGCAAGCCTATGTGTGTGCGAGAGCTTT**  
**TCTGATTATCCTCCCCTGGGCCGTTTTGCTGTGCGTGACATGAGACAGACAGTCGCTGTGGG**  
**TGTCATCAAAGCAGTGGACAAGAAGGCAGCTGGAGCTGGCAAGGTCACCAAGTCTGCCCAGA**  
**AAGCTCAGAAGGCTAAAATGGATGTTATCCCCAATACCTGCCATCCAGTATTAATCAGTGGT**  
**GGAAAAACGGTCTCAGAAGTGTGTTGCTCAATTGGCCATTTAAGTTTAATAGTAAAAGACTG**  
**GTTAATGATAACAATGCATCGTAAAACCTTCAGAAGGAAAGGAGAATGTTTTTGTGGACCAT**  
**ATGTTTTGTGTGTGGCAGTTTAAGTTATTAGTTTTTAAAATCAGTACTTTTTAATGAAAACA**  
**ACTTGACCAAAAATCTGTACAGAATTTGAGACCCATTAAAAAAAGTTTAATGAGAAAAAAA**  
**AAAAAAAAAAAAAAAAAAAAAAAAAATGACAGTG** | **CAACTCAATTTAAGAGCAGACTGTGCAGGG**  
**CCAAGGG**
